# Supplementary material for: Poor Sleep during the First Peak of the SARS-CoV-2 Pandemic: A Cross-Sectional Study
Source: MDPI journal article supplement (doi:10.3390/ijerph18010306), 2021-01-04
Supplement: s1 [file s1]

**Supplementary Material.** Survey on Lifestyle Adaptations in the General Population of the Province of Reggio Emilia Following the Emergency Quarantine COVID-19.

Sociodemographic factors.

1. **Sex**

| F | M |
|---|---|
|---|---|

2. **Age**

| 18–23 | 24–29 | 30–35 | 36–41 | 42–47 | 48–53 | 54–59 | 60–65 | 66–71 | >71 |
|-------|-------|-------|-------|-------|-------|-------|-------|-------|-----|
|-------|-------|-------|-------|-------|-------|-------|-------|-------|-----|

3. **City of residence:** \_\_\_\_\_

4. **Postal code:** \_\_\_\_\_

5. **Citizenship:**

- Italian
- Foreign

6. **Marital status:**

- Married
- Cohabitation
- Unmarried
- Widowed
- Divorced
- Separated

7. **Education level**

- None
- Primary school
- Middle high school
- High school
- University Degree
- Post-university degree

8. **Current home size**

- <50 m<sup>2</sup>
- 50 m<sup>2</sup>–100 m<sup>2</sup>
- >100 m<sup>2</sup>

9. **Does your home have any outdoor areas?**

- Garden
- Terrace
- Balcony
- Other
- None

10. **Do you have any children?**

- No

- Yes, at least one child under the age of 12
- Yes, all children over the age of 12

**11. Who do you live with? (multiple choice)**

- Alone
- With partner
- With child/children
- With parents
- With a family member with a serious disability (child/parent)
- With several family members with serious disabilities (children/parents)
- With other relatives or cohabitants

**12. How many people live with you (excluding yourself): \_\_\_\_\_**

**13. Are you in isolation after testing positive for COVID-19?**

- Yes
- No

**14. If so, what kind of isolation?**

- Own home
- Hotel
- Rems (COVID-19 residential facility)
- Other temporary home

Work-related factors.

**15. Before the COVID-19 emergency, what was your employment status?**

- Employed in the public sector
- Employed in the private sector
- Self-employed
- Student
- Retired
- Unemployed
- Housewife
- Other (specify): \_\_\_\_\_

**16. Before the COVID-19 emergency, where did you work?**

- At my workplace
- From home
- Both from home and at my workplace

**17. Current employment status**

- Continue to work
- On vacation leave
- Leave of absence
- Unemployment insurance

- Business closed due to the COVID-19 emergency
- Other

18. **If you work or study, how do you do these activities?**

- My job has been suspended
- I go to work
- From home
- I work both from home and at my workplace
- I follow class lectures from home

19. **Are you currently experiencing economic problems?**

- No problems
- Some problems
- Many problems

Use of digital devices data.

20. **Do you currently have a suitable Internet connection?**

- Yes
- No
- I don't know

21. **Do you currently have any IT devices, such as a computer, tablet, and/or smartphone, and a printer?**

- Yes
- No
- I don't know

22. **How do you evaluate your computer literacy?**

- Poor
- Sufficient
- Good
- Excellent

Lifestyle changes, anthropometric data, and health status.

23. **Weight:\_\_\_\_\_**

24. **Height:\_\_\_\_\_**

25. **Do you have any disease-related fee exemptions?**

- Yes
- No

26. **If so, for which disease?**

27. **Before the COVID-19 emergency, how did you consider yourself?**

- Active (a person who has a physically demanding job that requires considerable physical effort and/or 30 min of moderate physical activity at least 5 days a week and/or

intense activity for more than 20 min for at least 3 days a week)

- Partially active (a person who does not do a physically demanding job but who does some physical activity in his/her free time)
- Sedentary (a person who neither has a physically demanding job nor does any physical activity in his/her free time)

**28. If you were active or partially active, how many days per week?**

- 1–2 days/week
- 3–4 days/week
- >4 days/week

**29. Currently, how do you consider yourself?**

- Active (a person who has a physically demanding job that requires considerable physical effort and/or 30 min of moderate physical activity at least 5 days a week and/or intense activity for more than 20 min for at least 3 days a week)
- Partially active (a person who does not do a physically demanding job but who does some physical activity in his/her free time)
- Sedentary (a person who neither has a physically demanding job nor does any physical activity in his/her free time)

**30. If you are active or partially active, how many days per week?**

- 1–2 days/week
- 3–4 days/week
- >4 days/week

**31. What kind of physical activity do you currently do?**

- Treadmill/running/walking/stairs
- Stationary bike/bicycling
- Pilates/yoga/stretching/free body/gym
- Gardening
- Other: \_\_\_\_\_

**32. What kind of IT do you use to perform physical activity at home?**

- Group or one-to-one video chat
- Online courses/guides
- Applications on smartphones, tablets, computer
- Programs from my trainer/coach
- Alone
- Other

33. **Has your diet changed (improved/worsened in terms of the consumption of some foods, mealtimes, weight control)?**
- Yes
  - No
  - I don't know
34. **If so, what changes have occurred?**
- I have add snacks, sweets, carbonated drinks
  - I eat more abundant main meals (breakfast and/or lunch and/or dinner)
  - I eat at more regular times
  - I pay more attention to eating healthier (i.e., quality and/or variety and/or meal cooking)
  - I eat more prepackaged foods
  - Before COVID-19, I was forced to often eat out
35. **Before the COVID-19 emergency, how many portions of fruit or vegetables did you eat daily?** (portion means a quantity of raw fruit or vegetables that can be held in the palm of your hand, or half a plate of cooked vegetables)
- No portion of fruit or vegetables.
  - 1–2 portions/day
  - 3–4 portions/day
  - 5–6 portions/day
  - 6 portions/day
36. **Following the COVID-19 emergency, how has your consumption of fruit and vegetables changed?**
- Increased
  - Decreased
  - Unchanged
  - I don't eat fruit or vegetables
37. **Do you currently consider your diet healthy?**
- Yes
  - No
  - I don't know
38. **Before the COVID-19 emergency, how many alcoholic drinks did you consume?** (The alcoholic unit (UA) corresponds to 12 grams of ethanol, an amount approximately contained in a can of beer (330 mL at 4.5°), a glass of wine (125 mL at 12°), a glass of liqueur (40 mL at 40°), or an aperitif (80 mL at 38°)).
- None
  - <2 alcoholic units (UA) on average per day
  - ≥2 alcoholic units (UA) on average per day

39. **Following the COVID-19 emergency, how has your consumption of alcohol changed?**
- Increased
  - Decreased
  - Unchanged
  - I don't drink alcohol
40. **Before the emergency COVID-19, how did you consider yourself in terms of smoking?**
- Non-smoker (a person who claims to have smoked fewer than 100 cigarettes in his/her life (5 packs of 20) and is not currently a smoker)
  - Smoker (a person who claims to have smoked at least 100 cigarettes in his/her life (5 packs of 20) and to be a smoker at the time of the interview or to have stopped smoking less than 6 months ago)
  - Occasional smoker (a person who declares not to smoke every day)
  - Daily smoker (a person who claims to smoke at least one cigarette every day).
  - Ex-smoker (a person who claims to have smoked at least 100 cigarettes in his/her life (5 packs of 20), to NOT be a smoker at the time of the interview, and to have stopped smoking at least 6 months ago)
  - Former smoker (a person who claims to have quit smoking less than 6 months ago)
41. **Following the COVID-19 emergency, how has your consumption of cigarettes changed?**
- Increased
  - Decreased
  - Unchanged
  - I'm not a smoker
42. **Have your sleep habits changed during lockdown (sleep quantity and regularity)?**
- Yes
  - No
  - I don't know
43. **How do you consider your sleep quality now?**
- Very good
  - Good
  - Not very good
  - Not good at all

44. **What are the new activities that you are doing that you did not do before COVID-19?**

- Reading
- Resting
- Cooking
- Watching TV
- Using social media
- Dedicating time to family activities
- Gardening / housecleaning
- Volunteer work
- None
- Other: \_\_\_\_\_

45. **In the future, are you going to maintain your acquired lifestyle habits or return to your previous behaviors?**

|                                     |          |        |                        |
|-------------------------------------|----------|--------|------------------------|
| <b>(a) Physical activity</b>        | maintain | return | I don't know/unchanged |
| <b>(b) Eating habits</b>            | maintain | return | I don't know/unchanged |
| <b>(c) Smoking, drinking habits</b> | maintain | return | I don't know/unchanged |
| <b>(d) Sleep habits</b>             | maintain | return | I don't know/unchanged |
| <b>(e) Leisure activities</b>       | maintain | return | I don't know/unchanged |

Use of the provincial support services network.

46. **Have you used/Are you using any of the support made available by the municipality/associations/local health authorities?**

- Home delivery of groceries
- Home delivery of medications
- Information hotline
- Mental health hotline
- Economic aid, e.g., food vouchers
- Area facilities for the care of animals
- Activation of social services
- Other: \_\_\_\_\_

47. **What kind of support would you have liked in order to deal with this situation but which was not available?**

---



---



---

48. **What/who helped you to overcome the challenges of lockdown?**

- family or friends
- volunteers/neighbors
- healthcare professionals
- the municipality or local associations

- leisure activities (i.e., reading, garden care, etc.)
- continuing to work
- optimistic attitude
- physical activity
- drinking and/or smoking
- taking care of pets
- salary
- drugs
- other

Emotional state.

**49. At this moment, how are you feeling?**

|                                   |               |             |          |          |
|-----------------------------------|---------------|-------------|----------|----------|
| <b>Nervous</b>                    | 1. Not at all | 2. A little | 3. Quite | 4. A lot |
| <b>Upset</b>                      | 1. Not at all | 2. A little | 3. Quite | 4. A lot |
| <b>Worried</b>                    | 1. Not at all | 2. A little | 3. Quite | 4. A lot |
| <b>Afraid</b>                     | 1. Not at all | 2. A little | 3. Quite | 4. A lot |
| <b>Lonely</b>                     | 1. Not at all | 2. A little | 3. Quite | 4. A lot |
| <b>Uncertain about the future</b> | 1. Not at all | 2. A little | 3. Quite | 4. A lot |
